# Supplementary material for: Prevention of exertional lower body musculoskeletal injury in tactical populations: protocol for a systematic review and planned meta-analysis of prospective studies from 1955 to 2018
Source: Springer Nature journal article supplement (doi:10.1186/s13643-018-0730-9), 2018-05-05
Supplement: MOESM1 [file 15741246]

## ADDITIONAL FILE 1: Initial MEDLINE Search Strategy (Rose Turner, 12869 results)

("Athletes"[Mesh] OR "Athletic Injuries"[MeSH] OR "Sports"[Mesh] OR athlet\*[tiab] OR badminton[tiab] OR baseball\*[tiab] OR basketball\*[tiab] OR bicycl\*[tiab] OR bike\*[tiab] OR bowling[tiab] OR cardiorespiratory fitness[tiab] OR cutting movement\*[tiab] OR cyclist\*[tiab] OR dance\*[tiab] OR football\*[tiab] OR golf\*[tiab] OR gymnast\*[tiab] OR handball[tiab] OR hockey\*[tiab] OR judo[tiab] OR jump landing\*[tiab] OR martial art\*[tiab] OR rugb\*[tiab] OR runner\*[tiab] OR skiing\*[tiab] OR snowboard\*[tiab] OR soccer\*[tiab] OR sport\*[tiab] OR swim\*[tiab] OR tennis[tiab] OR volleyball\*[tiab] OR weightlift\*[tiab] OR athlet\*[ot] OR badminton[ot] OR baseball\*[ot] OR basketball\*[ot] OR bicycl\*[ot] OR bike\*[ot] OR bowling[ot] OR cardiorespiratory fitness[ot] OR cutting movement\*[ot] OR cyclist\*[ot] OR dance\*[ot] OR football\*[ot] OR golf\*[ot] OR gymnast\*[ot] OR handball[ot] OR hockey\*[ot] OR judo[ot] OR jump landing\*[ot] OR martial art\*[ot] OR rugb\*[ot] OR runner\*[ot] OR skiing\*[ot] OR snowboard\*[ot] OR soccer\*[ot] OR sport\*[ot] OR swim\*[ot] OR tennis[ot] OR volleyball\*[ot] OR weightlift\*[ot] OR "Firefighters"[Mesh] OR "Military Medicine"[Mesh] OR "Military Personnel"[Mesh] OR "Police"[Mesh] OR "Veterans"[Mesh] OR air force personnel[tiab] OR armed forces personnel[tiab] OR army personnel[tiab] OR army recruit\*[tiab] OR coast guard[tiab] OR fire and rescue personnell[tiab] OR fire fighter\*[tiab] OR firefighter\*[tiab] OR infantry[tiab] OR law enforcement officer\*[tiab] OR marines[tiab] OR military[tiab] OR navy personnel[tiab] OR police[tiab] OR sailor\*[tiab] OR service member\*[tiab] OR service personnel[tiab] OR soldier\*[tiab] OR submariner\*[tiab] OR troop\*[tiab] OR veteran\*[tiab] OR air force personnel[ot] OR armed forces personnel[ot] OR army personnel[ot] OR army recruit\*[ot] OR coast guard[ot] OR fire and rescue personnel[ot] OR fire fighter\*[ot] OR firefighter\*[ot] OR infantry[ot] OR law enforcement officers[ot] OR marines[ot] OR military[ot] OR navy personnel[ot] OR police[ot] OR sailor\*[ot] OR service member\*[ot] OR service personnel[ot] OR soldier\*[ot] OR submariners[ot] OR troop\*[ot] OR veteran\*[ot])

AND

("Arthralgia"[MeSH] OR "Arthritis"[MeSH] OR "Bone Diseases"[MeSH:noexp] OR "Bone Resorption"[MeSH] OR "Bursitis"[MeSH] OR "Compartment Syndromes"[MeSH] OR "Foot Deformities"[MeSH:noexp] OR "Foot Deformities, Acquired"[Mesh] OR "Foot Diseases"[Mesh:noexp] OR "injuries" [Subheading] OR "Joint Diseases"[MeSH:noexp] OR "Muscle Cramp"[MeSH] OR "Musculoskeletal Diseases"[MeSH:noexp] OR "Musculoskeletal Pain"[MeSH] OR "Patellofemoral Pain Syndrome"[Mesh] OR "Rhabdomyolysis"[MeSH] OR "Wounds and Injuries"[Mesh] OR dislocation\*[tiab] OR fracture\*[tiab] OR injuries[tiab] OR injury[tiab] OR pain syndrome\*[tiab] OR sprain\*[tiab] OR strain[tiab] OR strains[tiab] OR stress syndrome\*[tiab] OR dislocation\*[ot] OR fracture\*[ot] OR injuries[ot] OR injury[ot] OR sprain\*[ot] OR strain[ot] OR strains[ot]) AND ("Achilles Tendon"[Mesh] OR "Anterior Cruciate Ligament"[Mesh] OR "Bones of Lower Extremity"[Mesh] OR "Collateral Ligaments"[Mesh:noexp] OR "Foot Joints"[Mesh] OR "Gracilis Muscle"[Mesh] OR "Hamstring Muscles"[Mesh] OR "Hip Joint"[Mesh] OR "Knee Joint"[Mesh] OR "Lateral Ligament, Ankle"[Mesh] OR "Ligaments, Articular"[MeSH] OR "Lower Extremity"[Mesh] OR "Medial Collateral Ligament, Knee"[Mesh] OR "Muscles"[MeSH:NoExp] OR "Musculoskeletal System"[MeSH:NoExp] OR "Patellar Ligament"[Mesh] OR "Physical Education and Training"[Mesh] OR "Physical Fitness"[MeSH] OR "Plantar Plate"[Mesh] OR "Posterior Cruciate Ligament"[Mesh] OR "Psoas Muscles"[Mesh] OR "Quadriceps Muscle"[Mesh] OR "Round Ligament of Femur"[Mesh] OR "Running"[MeSH] OR ankle\*[tiab] OR anterior cruciate ligament[tiab] OR collateral ligaments[tiab] OR femoral neck[tiab] OR femur\*[tiab] OR foot[tiab] OR gracilis muscle[tiab] OR hamstring muscles[tiab] OR hip[tiab] OR hips[tiab] OR iliotibial band syndrome[tiab] OR knee\*[tiab] OR leg[tiab] OR lower extremit\*[tiab] OR lower limb\*[tiab] OR medial tibial[tiab] OR meniscal[tiab] OR metatarsal\*[tiab] OR patellar[tiab] OR patellofemoral[tiab] OR physical fitness[tiab] OR plantar plate[tiab] OR posterior cruciate ligament[tiab] OR psoas muscles[tiab] OR quadriceps muscle[tiab] OR shin splint\*[tiab] OR shoes[tiab] OR vastus lateralis[tiab] OR ankle\*[ot] OR anterior cruciate ligament[ot] OR collateral ligaments[ot] OR femoral neck[ot] OR femur\*[ot] OR foot[ot] OR gracilis muscle[ot] OR hamstring muscles[ot] OR hip[ot] OR hips[ot] OR iliotibial band syndrome[ot] OR knee\*[ot] OR leg[ot] OR lower extremit\*[ot] OR lower limb\*[ot] OR medial tibial stress syndrome[ot] OR meniscal[ot] OR metatarsal\*[ot] OR patellar[ot] OR patellofemoral[ot] OR physical fitness[ot] OR plantar plate[ot] OR posterior cruciate ligament[ot] OR psoas muscles[ot] OR quadriceps muscle[ot] OR shin splint\*[ot] OR shoes[ot] OR vastus lateralis[ot])

AND

("Epidemiology"[Mesh] OR "epidemiology" [Subheading] OR "Incidence"[Mesh] OR "Odds Ratio"[Mesh] OR "prevention and control"[Subheading] OR "Risk"[Mesh] OR cross product ratio[tiab] OR cross-product ratio[tiab] OR cross-product ratios[tiab] OR epidemiology[tiab] OR incidence[tiab] OR incidences[tiab] OR logistic regression\*[tiab] OR occurrence\*[tiab] OR odds ratios[tiab] OR predict\*[tiab] OR prevention[tiab] OR preventive measures[tiab] OR preventive therapy[tiab] OR prophylaxis[tiab] OR relative odds[tiab] OR risk\*[tiab] OR epidemiology[ot] OR incidence[ot] OR incidences[ot] OR logistic regression\*[ot] OR occurrence\*[ot] OR odds ratios[ot] OR predict\*[ot] OR prevention[ot] OR preventive measures[ot] OR preventive therapy[ot] OR prophylaxis[ot])
